# Supplementary material
Source: publisher figshare collection journal article supplement (https://acs.figshare.com/ndownloader/files/4587220)
Supplement: Supplementary file 1 [file 4587220]

  
data_shelxl 
  
_audit_creation_method            SHELXL-97 
_chemical_name_systematic 
; 
 ? 
; 
_chemical_name_common             ? 
_chemical_melting_point           ? 
_chemical_formula_moiety          'C25 H23 Br N O3 P S'
_chemical_formula_sum 
 'C25 H23 Br N O3 P S' 
_chemical_formula_weight          528.38 
  
loop_ 
 _atom_type_symbol 
 _atom_type_description 
 _atom_type_scat_dispersion_real 
 _atom_type_scat_dispersion_imag 
 _atom_type_scat_source 
 'C'  'C'   0.0033   0.0016 
 'International Tables Vol C Tables 4.2.6.8 and 6.1.1.4' 
 'H'  'H'   0.0000   0.0000 
 'International Tables Vol C Tables 4.2.6.8 and 6.1.1.4' 
 'N'  'N'   0.0061   0.0033 
 'International Tables Vol C Tables 4.2.6.8 and 6.1.1.4' 
 'O'  'O'   0.0106   0.0060 
 'International Tables Vol C Tables 4.2.6.8 and 6.1.1.4' 
 'Br'  'Br'  -0.2901   2.4595 
 'International Tables Vol C Tables 4.2.6.8 and 6.1.1.4' 
 'P'  'P'   0.1023   0.0942 
 'International Tables Vol C Tables 4.2.6.8 and 6.1.1.4' 
 'S'  'S'   0.1246   0.1234 
 'International Tables Vol C Tables 4.2.6.8 and 6.1.1.4' 
  
_symmetry_cell_setting            monoclinic 
_symmetry_space_group_name_H-M    'P 1 21 1' 
  
loop_ 
 _symmetry_equiv_pos_as_xyz 
 'x, y, z' 
 '-x, y+1/2, -z' 
  
_cell_length_a                    9.291(3) 
_cell_length_b                    23.680(7) 
_cell_length_c                    11.160(4) 
_cell_angle_alpha                 90.00 
_cell_angle_beta                  106.733(4) 
_cell_angle_gamma                 90.00 
_cell_volume                      2351.3(13) 
_cell_formula_units_Z             4 
_cell_measurement_temperature     113(2) 
_cell_measurement_reflns_used     6766 
_cell_measurement_theta_min       1.9 
_cell_measurement_theta_max       27.9 
  
_exptl_crystal_description        prism 
_exptl_crystal_colour             colorless 
_exptl_crystal_size_max           0.22 
_exptl_crystal_size_mid           0.20 
_exptl_crystal_size_min           0.18 
_exptl_crystal_density_meas       ? 
_exptl_crystal_density_diffrn     1.493 
_exptl_crystal_density_method     'not measured' 
_exptl_crystal_F_000              1080 
_exptl_absorpt_coefficient_mu     1.933 
_exptl_absorpt_correction_type    multi-scan 
_exptl_absorpt_correction_T_min   0.6758 
_exptl_absorpt_correction_T_max   0.7223 
_exptl_absorpt_process_details    CrystalClear 
  
_exptl_special_details 
; 
 ? 
; 
  
_diffrn_ambient_temperature       113(2) 
_diffrn_radiation_wavelength      0.71070 
_diffrn_radiation_type            MoK\a 
_diffrn_radiation_source          'Rotating anode' 
_diffrn_radiation_monochromator   confocal
_diffrn_measurement_device_type   'Rigaku Saturn' 
_diffrn_measurement_method        \w 
_diffrn_detector_area_resol_mean  7.31 
_diffrn_standards_number          ? 
_diffrn_standards_interval_count  ? 
_diffrn_standards_interval_time   ? 
_diffrn_standards_decay_%         ? 
_diffrn_reflns_number             17362 
_diffrn_reflns_av_R_equivalents   0.0506 
_diffrn_reflns_av_sigmaI/netI     0.1050 
_diffrn_reflns_limit_h_min        -12 
_diffrn_reflns_limit_h_max        12 
_diffrn_reflns_limit_k_min        -25 
_diffrn_reflns_limit_k_max        31 
_diffrn_reflns_limit_l_min        -11 
_diffrn_reflns_limit_l_max        14 
_diffrn_reflns_theta_min          1.91 
_diffrn_reflns_theta_max          27.87 
_reflns_number_total              9757 
_reflns_number_gt                 7537 
_reflns_threshold_expression      >2sigma(I) 
  
_computing_data_collection        CrystalClear 
_computing_cell_refinement        CrystalClear 
_computing_data_reduction         CrystalClear 
_computing_structure_solution     'SHELXS-97 (Sheldrick, 1990)' 
_computing_structure_refinement   'SHELXL-97 (Sheldrick, 1997)' 
_computing_molecular_graphics     ? 
_computing_publication_material   'CrystalStructure 3.7.0' 
  
_refine_special_details 
; 
 Refinement of F^2^ against ALL reflections.  The weighted R-factor wR and 
 goodness of fit S are based on F^2^, conventional R-factors R are based 
 on F, with F set to zero for negative F^2^. The threshold expression of 
 F^2^ > 2sigma(F^2^) is used only for calculating R-factors(gt) etc. and is 
 not relevant to the choice of reflections for refinement.  R-factors based 
 on F^2^ are statistically about twice as large as those based on F, and R- 
 factors based on ALL data will be even larger. 
; 
  
_refine_ls_structure_factor_coef  Fsqd 
_refine_ls_matrix_type            full 
_refine_ls_weighting_scheme       calc 
_refine_ls_weighting_details 
 'calc w=1/[\s^2^(Fo^2^)+(0.0206P)^2^+0.0000P] where P=(Fo^2^+2Fc^2^)/3' 
_atom_sites_solution_primary      direct 
_atom_sites_solution_secondary    difmap 
_atom_sites_solution_hydrogens    geom 
_refine_ls_hydrogen_treatment     mixed 
_refine_ls_extinction_method      none 
_refine_ls_extinction_coef        ? 
_refine_ls_abs_structure_details 
 'Flack H D (1983), Acta Cryst. A39, 876-881' 
_refine_ls_abs_structure_Flack    0.001(5) 
_refine_ls_number_reflns          9757 
_refine_ls_number_parameters      588 
_refine_ls_number_restraints      3 
_refine_ls_R_factor_all           0.0606 
_refine_ls_R_factor_gt            0.0428 
_refine_ls_wR_factor_ref          0.0832 
_refine_ls_wR_factor_gt           0.0749 
_refine_ls_goodness_of_fit_ref    0.914 
_refine_ls_restrained_S_all       0.913 
_refine_ls_shift/su_max           0.001 
_refine_ls_shift/su_mean          0.000 
  
loop_ 
 _atom_site_label 
 _atom_site_type_symbol 
 _atom_site_fract_x 
 _atom_site_fract_y 
 _atom_site_fract_z 
 _atom_site_U_iso_or_equiv 
 _atom_site_adp_type 
 _atom_site_occupancy 
 _atom_site_symmetry_multiplicity 
 _atom_site_calc_flag 
 _atom_site_refinement_flags 
 _atom_site_disorder_assembly 
 _atom_site_disorder_group 
Br1 Br -0.10784(5) 0.36421(2) 0.50614(5) 0.03792(13) Uani 1 1 d . . . 
Br2 Br 0.92258(5) -0.038489(18) 0.18900(4) 0.03090(11) Uani 1 1 d . . . 
P1 P 0.22567(12) 0.26121(4) 0.07685(9) 0.0187(2) Uani 1 1 d . . . 
P2 P 0.59973(12) 0.00667(4) 0.67901(9) 0.0184(2) Uani 1 1 d . . . 
S1 S 0.35502(12) 0.30502(5) 0.00124(10) 0.0262(2) Uani 1 1 d . . . 
S2 S 0.47049(12) -0.04863(4) 0.72739(9) 0.0238(2) Uani 1 1 d . . . 
N1 N 0.2798(4) 0.26302(13) 0.2311(3) 0.0192(7) Uani 1 1 d D . . 
N2 N 0.5577(4) 0.01571(13) 0.5261(3) 0.0205(7) Uani 1 1 d D . . 
O1 O 0.5195(3) 0.30156(12) 0.5149(2) 0.0276(7) Uani 1 1 d . . . 
O2 O 0.6979(4) 0.11080(12) 0.4367(3) 0.0384(8) Uani 1 1 d . . . 
O3 O 0.7280(4) 0.16181(12) 0.2769(3) 0.0328(8) Uani 1 1 d . . . 
O4 O 0.2968(3) -0.03882(13) 0.2395(2) 0.0256(6) Uani 1 1 d . . . 
O5 O 0.2098(4) 0.16279(12) 0.3650(3) 0.0405(9) Uani 1 1 d . . . 
O6 O 0.1022(4) 0.14183(11) 0.5148(3) 0.0286(7) Uani 1 1 d . . . 
C1 C 0.0944(5) 0.34644(16) 0.5131(4) 0.0233(9) Uani 1 1 d . . . 
C2 C 0.1987(5) 0.33776(16) 0.6283(4) 0.0265(10) Uani 1 1 d . . . 
H2 H 0.1701 0.3416 0.7030 0.032 Uiso 1 1 calc R . . 
C3 C 0.3442(5) 0.32350(16) 0.6338(4) 0.0255(10) Uani 1 1 d . . . 
H3 H 0.4179 0.3183 0.7120 0.031 Uiso 1 1 calc R . . 
C4 C 0.3806(5) 0.31696(16) 0.5227(4) 0.0221(9) Uani 1 1 d . . . 
C5 C 0.2754(5) 0.32545(16) 0.4077(4) 0.0201(9) Uani 1 1 d . . . 
C6 C 0.1282(5) 0.34016(16) 0.4011(4) 0.0219(9) Uani 1 1 d . . . 
H6 H 0.0542 0.3456 0.3230 0.026 Uiso 1 1 calc R . . 
C7 C 0.3475(5) 0.31186(16) 0.3049(4) 0.0201(8) Uani 1 1 d . . . 
H7 H 0.3387 0.3454 0.2487 0.024 Uiso 1 1 calc R . . 
C8 C 0.5150(5) 0.30423(17) 0.3829(3) 0.0226(9) Uani 1 1 d . . . 
H8 H 0.5732 0.3381 0.3699 0.027 Uiso 1 1 calc R . . 
C9 C 0.5871(5) 0.25262(16) 0.3499(4) 0.0225(9) Uani 1 1 d . . . 
H9 H 0.6092 0.2527 0.2719 0.027 Uiso 1 1 calc R . . 
C10 C 0.6234(5) 0.20661(17) 0.4198(4) 0.0241(9) Uani 1 1 d . . . 
H10 H 0.6085 0.2070 0.5006 0.029 Uiso 1 1 calc R . . 
C11 C 0.6848(5) 0.15541(18) 0.3802(4) 0.0265(10) Uani 1 1 d . . . 
C12 C 0.7807(6) 0.1095(2) 0.2313(4) 0.0418(13) Uani 1 1 d . . . 
H12A H 0.7105 0.0781 0.2314 0.050 Uiso 1 1 calc R . . 
H12B H 0.8815 0.0991 0.2858 0.050 Uiso 1 1 calc R . . 
C13 C 0.7870(8) 0.1207(2) 0.1031(5) 0.0624(19) Uani 1 1 d . . . 
H13A H 0.6874 0.1323 0.0509 0.094 Uiso 1 1 calc R . . 
H13B H 0.8182 0.0863 0.0685 0.094 Uiso 1 1 calc R . . 
H13C H 0.8596 0.1509 0.1047 0.094 Uiso 1 1 calc R . . 
C14 C 0.0318(5) 0.28459(15) 0.0220(4) 0.0194(9) Uani 1 1 d . . . 
C15 C -0.0244(5) 0.31063(16) -0.0936(4) 0.0241(9) Uani 1 1 d . . . 
H15 H 0.0395 0.3168 -0.1452 0.029 Uiso 1 1 calc R . . 
C16 C -0.1737(5) 0.32770(17) -0.1341(4) 0.0287(10) Uani 1 1 d . . . 
H16 H -0.2107 0.3461 -0.2127 0.034 Uiso 1 1 calc R . . 
C17 C -0.2686(5) 0.31821(18) -0.0612(4) 0.0285(10) Uani 1 1 d . . . 
H17 H -0.3706 0.3299 -0.0895 0.034 Uiso 1 1 calc R . . 
C18 C -0.2148(5) 0.29169(18) 0.0530(4) 0.0290(10) Uani 1 1 d . . . 
H18 H -0.2802 0.2851 0.1032 0.035 Uiso 1 1 calc R . . 
C19 C -0.0655(5) 0.27450(17) 0.0952(4) 0.0257(9) Uani 1 1 d . . . 
H19 H -0.0294 0.2559 0.1736 0.031 Uiso 1 1 calc R . . 
C20 C 0.2202(5) 0.18587(16) 0.0461(4) 0.0217(9) Uani 1 1 d . . . 
C21 C 0.3529(5) 0.15527(17) 0.0911(4) 0.0283(10) Uani 1 1 d . . . 
H21 H 0.4425 0.1739 0.1366 0.034 Uiso 1 1 calc R . . 
C22 C 0.3543(5) 0.09771(18) 0.0695(4) 0.0314(10) Uani 1 1 d . . . 
H22 H 0.4446 0.0768 0.1009 0.038 Uiso 1 1 calc R . . 
C23 C 0.2249(5) 0.07090(18) 0.0027(4) 0.0298(10) Uani 1 1 d . . . 
H23 H 0.2261 0.0314 -0.0115 0.036 Uiso 1 1 calc R . . 
C24 C 0.0936(6) 0.10082(19) -0.0439(4) 0.0361(11) Uani 1 1 d . . . 
H24 H 0.0050 0.0820 -0.0909 0.043 Uiso 1 1 calc R . . 
C25 C 0.0907(5) 0.15859(17) -0.0223(4) 0.0296(10) Uani 1 1 d . . . 
H25 H 0.0001 0.1793 -0.0543 0.036 Uiso 1 1 calc R . . 
C26 C 0.7232(4) -0.03945(19) 0.2016(3) 0.0233(8) Uani 1 1 d . . . 
C27 C 0.6050(5) -0.04892(16) 0.0954(3) 0.0231(9) Uani 1 1 d . . . 
H27 H 0.6241 -0.0549 0.0172 0.028 Uiso 1 1 calc R . . 
C28 C 0.4589(5) -0.04961(17) 0.1029(4) 0.0251(9) Uani 1 1 d . . . 
H28 H 0.3767 -0.0562 0.0308 0.030 Uiso 1 1 calc R . . 
C29 C 0.4357(4) -0.04038(18) 0.2184(3) 0.0225(8) Uani 1 1 d . . . 
C30 C 0.5538(5) -0.03108(17) 0.3240(3) 0.0216(9) Uani 1 1 d . . . 
C31 C 0.6989(5) -0.03070(17) 0.3181(3) 0.0229(9) Uani 1 1 d . . . 
H31 H 0.7807 -0.0247 0.3910 0.027 Uiso 1 1 calc R . . 
C32 C 0.4899(5) -0.02721(16) 0.4346(3) 0.0212(9) Uani 1 1 d . . . 
H32 H 0.5002 -0.0648 0.4772 0.025 Uiso 1 1 calc R . . 
C33 C 0.3210(5) -0.01617(17) 0.3664(4) 0.0246(9) Uani 1 1 d . . . 
H33 H 0.2576 -0.0376 0.4095 0.030 Uiso 1 1 calc R . . 
C34 C 0.2779(5) 0.04433(16) 0.3591(4) 0.0213(9) Uani 1 1 d . . . 
H34 H 0.3063 0.0675 0.3003 0.026 Uiso 1 1 calc R . . 
C35 C 0.2028(5) 0.06764(17) 0.4294(4) 0.0276(10) Uani 1 1 d . . . 
H35 H 0.1644 0.0440 0.4818 0.033 Uiso 1 1 calc R . . 
C36 C 0.1753(5) 0.12860(17) 0.4307(4) 0.0252(9) Uani 1 1 d . . . 
C37 C 0.0693(5) 0.20091(17) 0.5263(4) 0.0311(11) Uani 1 1 d . . . 
H37A H -0.0037 0.2146 0.4485 0.037 Uiso 1 1 calc R . . 
H37B H 0.1622 0.2237 0.5418 0.037 Uiso 1 1 calc R . . 
C38 C 0.0042(6) 0.2061(2) 0.6348(4) 0.0354(11) Uani 1 1 d . . . 
H38A H -0.0830 0.1811 0.6213 0.053 Uiso 1 1 calc R . . 
H38B H -0.0271 0.2453 0.6412 0.053 Uiso 1 1 calc R . . 
H38C H 0.0803 0.1954 0.7123 0.053 Uiso 1 1 calc R . . 
C39 C 0.7963(5) -0.01304(15) 0.7318(3) 0.0180(8) Uani 1 1 d . . . 
C40 C 0.8520(5) -0.04749(17) 0.8360(3) 0.0225(9) Uani 1 1 d . . . 
H40 H 0.7871 -0.0587 0.8838 0.027 Uiso 1 1 calc R . . 
C41 C 0.9981(5) -0.06565(17) 0.8714(4) 0.0261(10) Uani 1 1 d . . . 
H41 H 1.0336 -0.0892 0.9427 0.031 Uiso 1 1 calc R . . 
C42 C 1.0949(5) -0.04945(18) 0.8021(4) 0.0258(9) Uani 1 1 d . . . 
H42 H 1.1960 -0.0624 0.8249 0.031 Uiso 1 1 calc R . . 
C43 C 1.0411(5) -0.01411(18) 0.6994(4) 0.0257(10) Uani 1 1 d . . . 
H43 H 1.1068 -0.0025 0.6527 0.031 Uiso 1 1 calc R . . 
C44 C 0.8948(5) 0.00419(17) 0.6643(4) 0.0221(9) Uani 1 1 d . . . 
H44 H 0.8601 0.0285 0.5942 0.026 Uiso 1 1 calc R . . 
C45 C 0.5819(5) 0.07765(17) 0.7340(3) 0.0207(8) Uani 1 1 d . . . 
C46 C 0.4507(5) 0.09198(18) 0.7633(4) 0.0283(10) Uani 1 1 d . . . 
H46 H 0.3757 0.0643 0.7606 0.034 Uiso 1 1 calc R . . 
C47 C 0.4311(6) 0.14788(18) 0.7970(4) 0.0324(11) Uani 1 1 d . . . 
H47 H 0.3422 0.1581 0.8176 0.039 Uiso 1 1 calc R . . 
C48 C 0.5374(5) 0.18741(18) 0.8006(4) 0.0306(10) Uani 1 1 d . . . 
H48 H 0.5213 0.2251 0.8229 0.037 Uiso 1 1 calc R . . 
C49 C 0.6687(6) 0.17409(18) 0.7726(4) 0.0315(11) Uani 1 1 d . . . 
H49 H 0.7428 0.2022 0.7759 0.038 Uiso 1 1 calc R . . 
C50 C 0.6906(5) 0.11922(18) 0.7395(4) 0.0264(10) Uani 1 1 d . . . 
H50 H 0.7807 0.1096 0.7202 0.032 Uiso 1 1 calc R . . 
H1A H 0.260(4) 0.2338(10) 0.276(3) 0.017(10) Uiso 1 1 d D . . 
H2A H 0.574(5) 0.0501(8) 0.499(4) 0.027(12) Uiso 1 1 d D . . 
  
loop_ 
 _atom_site_aniso_label 
 _atom_site_aniso_U_11 
 _atom_site_aniso_U_22 
 _atom_site_aniso_U_33 
 _atom_site_aniso_U_23 
 _atom_site_aniso_U_13 
 _atom_site_aniso_U_12 
Br1 0.0305(3) 0.0424(3) 0.0447(3) -0.0118(2) 0.0168(2) 0.0031(2) 
Br2 0.0311(3) 0.0356(2) 0.0279(2) -0.0043(2) 0.01156(19) 0.0024(2) 
P1 0.0229(6) 0.0167(5) 0.0177(5) 0.0000(4) 0.0079(4) 0.0006(4) 
P2 0.0224(6) 0.0169(5) 0.0166(5) -0.0008(4) 0.0065(4) 0.0000(4) 
S1 0.0296(6) 0.0262(5) 0.0261(6) 0.0032(4) 0.0135(5) -0.0028(5) 
S2 0.0258(6) 0.0237(6) 0.0242(5) 0.0016(4) 0.0108(4) -0.0027(4) 
N1 0.027(2) 0.0145(16) 0.0161(17) -0.0012(13) 0.0059(15) -0.0051(15) 
N2 0.030(2) 0.0137(17) 0.0168(17) 0.0012(13) 0.0041(15) -0.0033(14) 
O1 0.0268(18) 0.0336(17) 0.0203(15) -0.0069(13) 0.0033(13) 0.0079(14) 
O2 0.056(2) 0.0193(16) 0.042(2) 0.0077(14) 0.0168(18) 0.0010(15) 
O3 0.048(2) 0.0257(16) 0.0281(17) 0.0056(13) 0.0173(16) 0.0151(15) 
O4 0.0255(16) 0.0251(14) 0.0255(14) -0.0090(14) 0.0060(12) -0.0038(14) 
O5 0.067(3) 0.0225(16) 0.048(2) 0.0068(15) 0.042(2) 0.0024(17) 
O6 0.044(2) 0.0185(15) 0.0323(18) -0.0018(12) 0.0245(16) 0.0031(14) 
C1 0.024(2) 0.017(2) 0.030(2) -0.0047(17) 0.0085(19) 0.0003(17) 
C2 0.035(3) 0.022(2) 0.024(2) -0.0097(17) 0.011(2) -0.0018(19) 
C3 0.036(3) 0.020(2) 0.016(2) -0.0048(16) 0.0010(19) 0.0011(19) 
C4 0.026(2) 0.016(2) 0.024(2) -0.0032(17) 0.0068(19) 0.0018(17) 
C5 0.029(2) 0.0145(18) 0.017(2) -0.0007(15) 0.0061(18) 0.0012(17) 
C6 0.027(2) 0.020(2) 0.017(2) -0.0005(16) 0.0026(17) 0.0026(17) 
C7 0.025(2) 0.0156(19) 0.020(2) -0.0007(16) 0.0074(18) 0.0018(17) 
C8 0.028(2) 0.020(2) 0.020(2) 0.0000(17) 0.0081(18) -0.0009(19) 
C9 0.026(2) 0.020(2) 0.022(2) -0.0032(16) 0.0077(19) -0.0008(17) 
C10 0.026(2) 0.025(2) 0.022(2) 0.0032(17) 0.0089(19) -0.0007(19) 
C11 0.024(2) 0.027(2) 0.025(2) -0.0014(18) 0.0027(19) 0.0034(19) 
C12 0.053(4) 0.035(3) 0.036(3) -0.005(2) 0.012(3) 0.016(3) 
C13 0.117(6) 0.035(3) 0.055(4) 0.001(3) 0.056(4) 0.013(3) 
C14 0.024(2) 0.0133(18) 0.021(2) -0.0038(15) 0.0079(18) -0.0029(16) 
C15 0.037(3) 0.016(2) 0.021(2) 0.0030(17) 0.0115(19) 0.0058(19) 
C16 0.037(3) 0.020(2) 0.025(2) 0.0021(17) 0.002(2) 0.0022(19) 
C17 0.023(3) 0.024(2) 0.035(3) -0.0035(19) 0.004(2) 0.0010(19) 
C18 0.024(3) 0.031(2) 0.033(2) -0.007(2) 0.010(2) -0.0007(19) 
C19 0.025(2) 0.027(2) 0.027(2) -0.0006(18) 0.011(2) 0.0003(19) 
C20 0.030(2) 0.020(2) 0.017(2) 0.0005(16) 0.0104(19) 0.0035(18) 
C21 0.032(3) 0.022(2) 0.029(2) 0.0001(18) 0.007(2) 0.0013(19) 
C22 0.034(3) 0.024(2) 0.032(3) -0.0047(19) 0.004(2) 0.008(2) 
C23 0.041(3) 0.015(2) 0.029(2) -0.0069(18) 0.004(2) 0.0011(19) 
C24 0.039(3) 0.024(2) 0.038(3) -0.013(2) 0.000(2) -0.004(2) 
C25 0.034(3) 0.021(2) 0.031(2) -0.0056(18) 0.005(2) 0.0033(19) 
C26 0.028(2) 0.023(2) 0.022(2) -0.0011(19) 0.0110(17) 0.005(2) 
C27 0.032(2) 0.021(2) 0.018(2) -0.0027(16) 0.0085(18) 0.0022(18) 
C28 0.029(2) 0.022(2) 0.019(2) -0.0017(16) -0.0016(17) 0.0039(18) 
C29 0.028(2) 0.0177(19) 0.020(2) -0.0038(18) 0.0031(17) -0.0025(19) 
C30 0.031(2) 0.017(2) 0.0167(19) -0.0021(16) 0.0069(17) -0.0008(18) 
C31 0.030(2) 0.021(2) 0.0136(19) -0.0029(16) 0.0009(17) 0.0053(18) 
C32 0.030(2) 0.017(2) 0.017(2) 0.0006(15) 0.0069(17) -0.0020(17) 
C33 0.034(3) 0.023(2) 0.018(2) -0.0051(16) 0.0093(19) -0.0063(18) 
C34 0.028(2) 0.0155(19) 0.021(2) -0.0001(16) 0.0071(18) -0.0015(17) 
C35 0.039(3) 0.018(2) 0.033(3) 0.0017(18) 0.021(2) 0.0027(19) 
C36 0.029(3) 0.023(2) 0.025(2) 0.0017(18) 0.010(2) 0.0029(18) 
C37 0.045(3) 0.018(2) 0.035(3) -0.0043(19) 0.019(2) 0.002(2) 
C38 0.042(3) 0.036(3) 0.033(3) -0.007(2) 0.017(2) 0.005(2) 
C39 0.022(2) 0.0164(19) 0.014(2) -0.0039(15) 0.0030(16) 0.0033(16) 
C40 0.029(2) 0.024(2) 0.0159(19) -0.0036(17) 0.0101(17) -0.0010(19) 
C41 0.031(3) 0.024(2) 0.022(2) -0.0022(17) 0.0062(19) 0.0010(19) 
C42 0.023(2) 0.029(2) 0.024(2) -0.0051(18) 0.0047(18) 0.0043(19) 
C43 0.026(2) 0.034(2) 0.018(2) -0.0011(17) 0.0065(18) -0.0039(19) 
C44 0.029(2) 0.0193(19) 0.019(2) 0.0019(16) 0.0092(18) -0.0026(18) 
C45 0.024(2) 0.021(2) 0.014(2) -0.0002(15) 0.0005(17) -0.0001(17) 
C46 0.029(3) 0.028(2) 0.030(2) -0.0065(19) 0.012(2) 0.0029(19) 
C47 0.039(3) 0.030(2) 0.031(3) -0.002(2) 0.014(2) 0.008(2) 
C48 0.043(3) 0.020(2) 0.028(2) -0.0030(18) 0.008(2) 0.006(2) 
C49 0.044(3) 0.019(2) 0.028(2) 0.0020(18) 0.004(2) -0.001(2) 
C50 0.029(3) 0.027(2) 0.024(2) -0.0019(18) 0.009(2) 0.0026(19) 
  
_geom_special_details 
; 
 All esds (except the esd in the dihedral angle between two l.s. planes) 
 are estimated using the full covariance matrix.  The cell esds are taken 
 into account individually in the estimation of esds in distances, angles 
 and torsion angles; correlations between esds in cell parameters are only 
 used when they are defined by crystal symmetry.  An approximate (isotropic) 
 treatment of cell esds is used for estimating esds involving l.s. planes. 
; 
  
loop_ 
 _geom_bond_atom_site_label_1 
 _geom_bond_atom_site_label_2 
 _geom_bond_distance 
 _geom_bond_site_symmetry_2 
 _geom_bond_publ_flag 
Br1 C1 1.906(4) . ? 
Br2 C26 1.898(4) . ? 
P1 N1 1.649(3) . ? 
P1 C14 1.814(4) . ? 
P1 C20 1.815(4) . ? 
P1 S1 1.9535(14) . ? 
P2 N2 1.651(3) . ? 
P2 C39 1.811(4) . ? 
P2 C45 1.813(4) . ? 
P2 S2 1.9548(14) . ? 
N1 C7 1.454(5) . ? 
N1 H1A 0.902(10) . ? 
N2 C32 1.450(5) . ? 
N2 H2A 0.895(10) . ? 
O1 C4 1.368(5) . ? 
O1 C8 1.464(4) . ? 
O2 C11 1.218(5) . ? 
O3 C11 1.335(5) . ? 
O3 C12 1.475(5) . ? 
O4 C29 1.378(4) . ? 
O4 C33 1.470(4) . ? 
O5 C36 1.196(5) . ? 
O6 C36 1.345(4) . ? 
O6 C37 1.445(5) . ? 
C1 C6 1.381(5) . ? 
C1 C2 1.385(6) . ? 
C2 C3 1.377(6) . ? 
C2 H2 0.9500 . ? 
C3 C4 1.385(5) . ? 
C3 H3 0.9500 . ? 
C4 C5 1.386(6) . ? 
C5 C6 1.392(6) . ? 
C5 C7 1.520(5) . ? 
C6 H6 0.9500 . ? 
C7 C8 1.559(6) . ? 
C7 H7 1.0000 . ? 
C8 C9 1.490(5) . ? 
C8 H8 1.0000 . ? 
C9 C10 1.326(6) . ? 
C9 H9 0.9500 . ? 
C10 C11 1.461(6) . ? 
C10 H10 0.9500 . ? 
C12 C13 1.472(6) . ? 
C12 H12A 0.9900 . ? 
C12 H12B 0.9900 . ? 
C13 H13A 0.9800 . ? 
C13 H13B 0.9800 . ? 
C13 H13C 0.9800 . ? 
C14 C15 1.389(5) . ? 
C14 C19 1.402(5) . ? 
C15 C16 1.389(6) . ? 
C15 H15 0.9500 . ? 
C16 C17 1.380(6) . ? 
C16 H16 0.9500 . ? 
C17 C18 1.379(6) . ? 
C17 H17 0.9500 . ? 
C18 C19 1.392(6) . ? 
C18 H18 0.9500 . ? 
C19 H19 0.9500 . ? 
C20 C25 1.386(6) . ? 
C20 C21 1.393(6) . ? 
C21 C22 1.385(6) . ? 
C21 H21 0.9500 . ? 
C22 C23 1.374(6) . ? 
C22 H22 0.9500 . ? 
C23 C24 1.377(6) . ? 
C23 H23 0.9500 . ? 
C24 C25 1.391(6) . ? 
C24 H24 0.9500 . ? 
C25 H25 0.9500 . ? 
C26 C27 1.383(5) . ? 
C26 C31 1.397(5) . ? 
C27 C28 1.384(6) . ? 
C27 H27 0.9500 . ? 
C28 C29 1.384(5) . ? 
C28 H28 0.9500 . ? 
C29 C30 1.377(5) . ? 
C30 C31 1.369(5) . ? 
C30 C32 1.519(5) . ? 
C31 H31 0.9500 . ? 
C32 C33 1.556(6) . ? 
C32 H32 1.0000 . ? 
C33 C34 1.484(5) . ? 
C33 H33 1.0000 . ? 
C34 C35 1.312(5) . ? 
C34 H34 0.9500 . ? 
C35 C36 1.467(6) . ? 
C35 H35 0.9500 . ? 
C37 C38 1.505(6) . ? 
C37 H37A 0.9900 . ? 
C37 H37B 0.9900 . ? 
C38 H38A 0.9800 . ? 
C38 H38B 0.9800 . ? 
C38 H38C 0.9800 . ? 
C39 C40 1.393(5) . ? 
C39 C44 1.403(5) . ? 
C40 C41 1.369(6) . ? 
C40 H40 0.9500 . ? 
C41 C42 1.398(5) . ? 
C41 H41 0.9500 . ? 
C42 C43 1.391(6) . ? 
C42 H42 0.9500 . ? 
C43 C44 1.372(6) . ? 
C43 H43 0.9500 . ? 
C44 H44 0.9500 . ? 
C45 C46 1.392(6) . ? 
C45 C50 1.399(6) . ? 
C46 C47 1.402(6) . ? 
C46 H46 0.9500 . ? 
C47 C48 1.353(6) . ? 
C47 H47 0.9500 . ? 
C48 C49 1.381(6) . ? 
C48 H48 0.9500 . ? 
C49 C50 1.382(6) . ? 
C49 H49 0.9500 . ? 
C50 H50 0.9500 . ? 
  
loop_ 
 _geom_angle_atom_site_label_1 
 _geom_angle_atom_site_label_2 
 _geom_angle_atom_site_label_3 
 _geom_angle 
 _geom_angle_site_symmetry_1 
 _geom_angle_site_symmetry_3 
 _geom_angle_publ_flag 
N1 P1 C14 108.62(17) . . ? 
N1 P1 C20 101.90(17) . . ? 
C14 P1 C20 105.39(19) . . ? 
N1 P1 S1 113.35(13) . . ? 
C14 P1 S1 111.51(13) . . ? 
C20 P1 S1 115.31(13) . . ? 
N2 P2 C39 106.64(17) . . ? 
N2 P2 C45 102.23(17) . . ? 
C39 P2 C45 108.09(18) . . ? 
N2 P2 S2 113.01(13) . . ? 
C39 P2 S2 112.30(13) . . ? 
C45 P2 S2 113.85(13) . . ? 
C7 N1 P1 124.4(3) . . ? 
C7 N1 H1A 115(2) . . ? 
P1 N1 H1A 121(2) . . ? 
C32 N2 P2 124.2(3) . . ? 
C32 N2 H2A 119(3) . . ? 
P2 N2 H2A 117(3) . . ? 
C4 O1 C8 107.3(3) . . ? 
C11 O3 C12 114.5(3) . . ? 
C29 O4 C33 106.5(3) . . ? 
C36 O6 C37 116.7(3) . . ? 
C6 C1 C2 123.0(4) . . ? 
C6 C1 Br1 117.7(3) . . ? 
C2 C1 Br1 119.2(3) . . ? 
C3 C2 C1 119.5(4) . . ? 
C3 C2 H2 120.2 . . ? 
C1 C2 H2 120.2 . . ? 
C4 C3 C2 118.5(4) . . ? 
C4 C3 H3 120.7 . . ? 
C2 C3 H3 120.7 . . ? 
O1 C4 C3 124.4(4) . . ? 
O1 C4 C5 114.0(3) . . ? 
C3 C4 C5 121.6(4) . . ? 
C4 C5 C6 120.4(3) . . ? 
C4 C5 C7 108.7(4) . . ? 
C6 C5 C7 130.8(4) . . ? 
C1 C6 C5 117.0(4) . . ? 
C1 C6 H6 121.5 . . ? 
C5 C6 H6 121.5 . . ? 
N1 C7 C5 112.5(3) . . ? 
N1 C7 C8 115.1(3) . . ? 
C5 C7 C8 100.9(3) . . ? 
N1 C7 H7 109.3 . . ? 
C5 C7 H7 109.3 . . ? 
C8 C7 H7 109.3 . . ? 
O1 C8 C9 109.2(3) . . ? 
O1 C8 C7 107.6(3) . . ? 
C9 C8 C7 113.9(3) . . ? 
O1 C8 H8 108.7 . . ? 
C9 C8 H8 108.7 . . ? 
C7 C8 H8 108.7 . . ? 
C10 C9 C8 125.8(4) . . ? 
C10 C9 H9 117.1 . . ? 
C8 C9 H9 117.1 . . ? 
C9 C10 C11 124.0(4) . . ? 
C9 C10 H10 118.0 . . ? 
C11 C10 H10 118.0 . . ? 
O2 C11 O3 122.3(4) . . ? 
O2 C11 C10 123.6(4) . . ? 
O3 C11 C10 114.1(4) . . ? 
O3 C12 C13 107.2(4) . . ? 
O3 C12 H12A 110.3 . . ? 
C13 C12 H12A 110.3 . . ? 
O3 C12 H12B 110.3 . . ? 
C13 C12 H12B 110.3 . . ? 
H12A C12 H12B 108.5 . . ? 
C12 C13 H13A 109.5 . . ? 
C12 C13 H13B 109.5 . . ? 
H13A C13 H13B 109.5 . . ? 
C12 C13 H13C 109.5 . . ? 
H13A C13 H13C 109.5 . . ? 
H13B C13 H13C 109.5 . . ? 
C15 C14 C19 118.9(4) . . ? 
C15 C14 P1 121.3(3) . . ? 
C19 C14 P1 119.7(3) . . ? 
C14 C15 C16 120.3(4) . . ? 
C14 C15 H15 119.9 . . ? 
C16 C15 H15 119.9 . . ? 
C17 C16 C15 120.5(4) . . ? 
C17 C16 H16 119.7 . . ? 
C15 C16 H16 119.7 . . ? 
C16 C17 C18 119.8(4) . . ? 
C16 C17 H17 120.1 . . ? 
C18 C17 H17 120.1 . . ? 
C17 C18 C19 120.4(4) . . ? 
C17 C18 H18 119.8 . . ? 
C19 C18 H18 119.8 . . ? 
C18 C19 C14 120.0(4) . . ? 
C18 C19 H19 120.0 . . ? 
C14 C19 H19 120.0 . . ? 
C25 C20 C21 119.6(4) . . ? 
C25 C20 P1 122.3(3) . . ? 
C21 C20 P1 118.0(3) . . ? 
C22 C21 C20 120.1(4) . . ? 
C22 C21 H21 120.0 . . ? 
C20 C21 H21 120.0 . . ? 
C23 C22 C21 119.9(4) . . ? 
C23 C22 H22 120.1 . . ? 
C21 C22 H22 120.1 . . ? 
C22 C23 C24 120.6(4) . . ? 
C22 C23 H23 119.7 . . ? 
C24 C23 H23 119.7 . . ? 
C23 C24 C25 120.0(4) . . ? 
C23 C24 H24 120.0 . . ? 
C25 C24 H24 120.0 . . ? 
C20 C25 C24 119.8(4) . . ? 
C20 C25 H25 120.1 . . ? 
C24 C25 H25 120.1 . . ? 
C27 C26 C31 121.4(4) . . ? 
C27 C26 Br2 119.3(3) . . ? 
C31 C26 Br2 119.3(3) . . ? 
C26 C27 C28 120.0(3) . . ? 
C26 C27 H27 120.0 . . ? 
C28 C27 H27 120.0 . . ? 
C29 C28 C27 118.2(4) . . ? 
C29 C28 H28 120.9 . . ? 
C27 C28 H28 120.9 . . ? 
C30 C29 O4 113.8(3) . . ? 
C30 C29 C28 121.5(4) . . ? 
O4 C29 C28 124.6(4) . . ? 
C31 C30 C29 120.9(3) . . ? 
C31 C30 C32 131.3(4) . . ? 
C29 C30 C32 107.7(3) . . ? 
C30 C31 C26 117.9(4) . . ? 
C30 C31 H31 121.0 . . ? 
C26 C31 H31 121.0 . . ? 
N2 C32 C30 115.0(3) . . ? 
N2 C32 C33 113.5(3) . . ? 
C30 C32 C33 100.8(3) . . ? 
N2 C32 H32 109.0 . . ? 
C30 C32 H32 109.0 . . ? 
C33 C32 H32 109.0 . . ? 
O4 C33 C34 109.6(3) . . ? 
O4 C33 C32 105.2(3) . . ? 
C34 C33 C32 114.0(3) . . ? 
O4 C33 H33 109.3 . . ? 
C34 C33 H33 109.3 . . ? 
C32 C33 H33 109.3 . . ? 
C35 C34 C33 123.7(4) . . ? 
C35 C34 H34 118.1 . . ? 
C33 C34 H34 118.1 . . ? 
C34 C35 C36 122.9(4) . . ? 
C34 C35 H35 118.5 . . ? 
C36 C35 H35 118.5 . . ? 
O5 C36 O6 123.3(4) . . ? 
O5 C36 C35 125.6(4) . . ? 
O6 C36 C35 111.1(3) . . ? 
O6 C37 C38 107.2(3) . . ? 
O6 C37 H37A 110.3 . . ? 
C38 C37 H37A 110.3 . . ? 
O6 C37 H37B 110.3 . . ? 
C38 C37 H37B 110.3 . . ? 
H37A C37 H37B 108.5 . . ? 
C37 C38 H38A 109.5 . . ? 
C37 C38 H38B 109.5 . . ? 
H38A C38 H38B 109.5 . . ? 
C37 C38 H38C 109.5 . . ? 
H38A C38 H38C 109.5 . . ? 
H38B C38 H38C 109.5 . . ? 
C40 C39 C44 118.4(4) . . ? 
C40 C39 P2 121.4(3) . . ? 
C44 C39 P2 120.2(3) . . ? 
C41 C40 C39 121.6(4) . . ? 
C41 C40 H40 119.2 . . ? 
C39 C40 H40 119.2 . . ? 
C40 C41 C42 119.8(4) . . ? 
C40 C41 H41 120.1 . . ? 
C42 C41 H41 120.1 . . ? 
C41 C42 C43 119.0(4) . . ? 
C41 C42 H42 120.5 . . ? 
C43 C42 H42 120.5 . . ? 
C44 C43 C42 121.1(4) . . ? 
C44 C43 H43 119.4 . . ? 
C42 C43 H43 119.4 . . ? 
C43 C44 C39 120.1(4) . . ? 
C43 C44 H44 120.0 . . ? 
C39 C44 H44 120.0 . . ? 
C46 C45 C50 119.2(4) . . ? 
C46 C45 P2 118.5(3) . . ? 
C50 C45 P2 122.1(3) . . ? 
C45 C46 C47 118.9(4) . . ? 
C45 C46 H46 120.6 . . ? 
C47 C46 H46 120.6 . . ? 
C48 C47 C46 120.7(4) . . ? 
C48 C47 H47 119.6 . . ? 
C46 C47 H47 119.6 . . ? 
C47 C48 C49 121.4(4) . . ? 
C47 C48 H48 119.3 . . ? 
C49 C48 H48 119.3 . . ? 
C48 C49 C50 118.9(4) . . ? 
C48 C49 H49 120.6 . . ? 
C50 C49 H49 120.6 . . ? 
C49 C50 C45 120.9(4) . . ? 
C49 C50 H50 119.6 . . ? 
C45 C50 H50 119.6 . . ? 
  
loop_ 
 _geom_torsion_atom_site_label_1 
 _geom_torsion_atom_site_label_2 
 _geom_torsion_atom_site_label_3 
 _geom_torsion_atom_site_label_4 
 _geom_torsion 
 _geom_torsion_site_symmetry_1 
 _geom_torsion_site_symmetry_2 
 _geom_torsion_site_symmetry_3 
 _geom_torsion_site_symmetry_4 
 _geom_torsion_publ_flag 
C14 P1 N1 C7 -89.6(3) . . . . ? 
C20 P1 N1 C7 159.5(3) . . . . ? 
S1 P1 N1 C7 35.0(4) . . . . ? 
C39 P2 N2 C32 95.8(3) . . . . ? 
C45 P2 N2 C32 -150.8(3) . . . . ? 
S2 P2 N2 C32 -28.1(4) . . . . ? 
C6 C1 C2 C3 1.6(6) . . . . ? 
Br1 C1 C2 C3 178.4(3) . . . . ? 
C1 C2 C3 C4 -1.5(6) . . . . ? 
C8 O1 C4 C3 -175.1(4) . . . . ? 
C8 O1 C4 C5 5.3(4) . . . . ? 
C2 C3 C4 O1 -178.3(4) . . . . ? 
C2 C3 C4 C5 1.2(6) . . . . ? 
O1 C4 C5 C6 178.7(3) . . . . ? 
C3 C4 C5 C6 -0.9(6) . . . . ? 
O1 C4 C5 C7 2.7(5) . . . . ? 
C3 C4 C5 C7 -176.9(4) . . . . ? 
C2 C1 C6 C5 -1.2(6) . . . . ? 
Br1 C1 C6 C5 -178.1(3) . . . . ? 
C4 C5 C6 C1 0.9(6) . . . . ? 
C7 C5 C6 C1 175.8(4) . . . . ? 
P1 N1 C7 C5 131.8(3) . . . . ? 
P1 N1 C7 C8 -113.3(3) . . . . ? 
C4 C5 C7 N1 114.4(4) . . . . ? 
C6 C5 C7 N1 -61.0(5) . . . . ? 
C4 C5 C7 C8 -8.8(4) . . . . ? 
C6 C5 C7 C8 175.8(4) . . . . ? 
C4 O1 C8 C9 -134.9(3) . . . . ? 
C4 O1 C8 C7 -10.8(4) . . . . ? 
N1 C7 C8 O1 -109.7(3) . . . . ? 
C5 C7 C8 O1 11.7(4) . . . . ? 
N1 C7 C8 C9 11.5(4) . . . . ? 
C5 C7 C8 C9 132.9(3) . . . . ? 
O1 C8 C9 C10 12.1(6) . . . . ? 
C7 C8 C9 C10 -108.1(5) . . . . ? 
C8 C9 C10 C11 175.7(4) . . . . ? 
C12 O3 C11 O2 4.9(6) . . . . ? 
C12 O3 C11 C10 -176.1(4) . . . . ? 
C9 C10 C11 O2 -169.2(4) . . . . ? 
C9 C10 C11 O3 11.8(7) . . . . ? 
C11 O3 C12 C13 166.0(5) . . . . ? 
N1 P1 C14 C15 151.6(3) . . . . ? 
C20 P1 C14 C15 -99.8(3) . . . . ? 
S1 P1 C14 C15 26.0(4) . . . . ? 
N1 P1 C14 C19 -30.7(4) . . . . ? 
C20 P1 C14 C19 77.8(3) . . . . ? 
S1 P1 C14 C19 -156.3(3) . . . . ? 
C19 C14 C15 C16 1.7(6) . . . . ? 
P1 C14 C15 C16 179.4(3) . . . . ? 
C14 C15 C16 C17 -1.1(6) . . . . ? 
C15 C16 C17 C18 0.2(6) . . . . ? 
C16 C17 C18 C19 0.1(6) . . . . ? 
C17 C18 C19 C14 0.6(6) . . . . ? 
C15 C14 C19 C18 -1.5(6) . . . . ? 
P1 C14 C19 C18 -179.2(3) . . . . ? 
N1 P1 C20 C25 121.6(3) . . . . ? 
C14 P1 C20 C25 8.2(4) . . . . ? 
S1 P1 C20 C25 -115.2(3) . . . . ? 
N1 P1 C20 C21 -60.0(3) . . . . ? 
C14 P1 C20 C21 -173.4(3) . . . . ? 
S1 P1 C20 C21 63.2(3) . . . . ? 
C25 C20 C21 C22 -1.3(6) . . . . ? 
P1 C20 C21 C22 -179.7(3) . . . . ? 
C20 C21 C22 C23 0.6(6) . . . . ? 
C21 C22 C23 C24 0.4(7) . . . . ? 
C22 C23 C24 C25 -0.7(7) . . . . ? 
C21 C20 C25 C24 0.9(6) . . . . ? 
P1 C20 C25 C24 179.3(3) . . . . ? 
C23 C24 C25 C20 0.1(7) . . . . ? 
C31 C26 C27 C28 0.3(6) . . . . ? 
Br2 C26 C27 C28 -179.8(3) . . . . ? 
C26 C27 C28 C29 0.3(6) . . . . ? 
C33 O4 C29 C30 11.1(5) . . . . ? 
C33 O4 C29 C28 -168.1(4) . . . . ? 
C27 C28 C29 C30 -0.4(6) . . . . ? 
C27 C28 C29 O4 178.7(4) . . . . ? 
O4 C29 C30 C31 -179.3(4) . . . . ? 
C28 C29 C30 C31 0.0(7) . . . . ? 
O4 C29 C30 C32 5.1(5) . . . . ? 
C28 C29 C30 C32 -175.7(4) . . . . ? 
C29 C30 C31 C26 0.6(6) . . . . ? 
C32 C30 C31 C26 175.1(4) . . . . ? 
C27 C26 C31 C30 -0.8(6) . . . . ? 
Br2 C26 C31 C30 179.4(3) . . . . ? 
P2 N2 C32 C30 -138.7(3) . . . . ? 
P2 N2 C32 C33 105.9(3) . . . . ? 
C31 C30 C32 N2 44.8(6) . . . . ? 
C29 C30 C32 N2 -140.3(4) . . . . ? 
C31 C30 C32 C33 167.3(4) . . . . ? 
C29 C30 C32 C33 -17.8(4) . . . . ? 
C29 O4 C33 C34 101.0(4) . . . . ? 
C29 O4 C33 C32 -22.0(4) . . . . ? 
N2 C32 C33 O4 147.3(3) . . . . ? 
C30 C32 C33 O4 23.8(4) . . . . ? 
N2 C32 C33 C34 27.2(4) . . . . ? 
C30 C32 C33 C34 -96.4(4) . . . . ? 
O4 C33 C34 C35 138.1(4) . . . . ? 
C32 C33 C34 C35 -104.3(5) . . . . ? 
C33 C34 C35 C36 173.1(4) . . . . ? 
C37 O6 C36 O5 -1.8(7) . . . . ? 
C37 O6 C36 C35 179.4(4) . . . . ? 
C34 C35 C36 O5 4.3(8) . . . . ? 
C34 C35 C36 O6 -177.0(4) . . . . ? 
C36 O6 C37 C38 -173.6(4) . . . . ? 
N2 P2 C39 C40 -150.3(3) . . . . ? 
C45 P2 C39 C40 100.5(3) . . . . ? 
S2 P2 C39 C40 -26.0(3) . . . . ? 
N2 P2 C39 C44 26.7(4) . . . . ? 
C45 P2 C39 C44 -82.6(3) . . . . ? 
S2 P2 C39 C44 151.0(3) . . . . ? 
C44 C39 C40 C41 -1.6(6) . . . . ? 
P2 C39 C40 C41 175.5(3) . . . . ? 
C39 C40 C41 C42 0.1(6) . . . . ? 
C40 C41 C42 C43 1.2(6) . . . . ? 
C41 C42 C43 C44 -1.0(6) . . . . ? 
C42 C43 C44 C39 -0.5(6) . . . . ? 
C40 C39 C44 C43 1.7(6) . . . . ? 
P2 C39 C44 C43 -175.4(3) . . . . ? 
N2 P2 C45 C46 99.9(4) . . . . ? 
C39 P2 C45 C46 -147.8(3) . . . . ? 
S2 P2 C45 C46 -22.3(4) . . . . ? 
N2 P2 C45 C50 -75.6(4) . . . . ? 
C39 P2 C45 C50 36.7(4) . . . . ? 
S2 P2 C45 C50 162.2(3) . . . . ? 
C50 C45 C46 C47 0.3(6) . . . . ? 
P2 C45 C46 C47 -175.4(3) . . . . ? 
C45 C46 C47 C48 0.2(7) . . . . ? 
C46 C47 C48 C49 -0.6(7) . . . . ? 
C47 C48 C49 C50 0.4(7) . . . . ? 
C48 C49 C50 C45 0.2(7) . . . . ? 
C46 C45 C50 C49 -0.5(6) . . . . ? 
P2 C45 C50 C49 175.0(3) . . . . ? 
  
_diffrn_measured_fraction_theta_max    0.999 
_diffrn_reflns_theta_full              27.87 
_diffrn_measured_fraction_theta_full   0.999 
_refine_diff_density_max    0.417 
_refine_diff_density_min   -0.495 
_refine_diff_density_rms    0.082 
